# Supplementary material for: Impact of preterm birth on brain development and long-term outcome: protocol for a cohort study in Scotland
Source: PubMed Central journal article supplement (PMC7059503; doi:10.1136/bmjopen-2019-035854), 2020-03-04
Supplement: bmjopen-2019-035854supp004.pdf [file bmjopen-2019-035854supp004.pdf]

## SIEMENS MAGNETOM Prisma

\\Study Protocols\BRAIN\Neonates\Theirworld - E161723 - MT\_test\MTSatOn\_neonate\_v2

TA: 2:58 PM: REF Voxel size: 2.0×2.0×2.0 mmPAT: 3 Rel. SNR: 1.00 : qfl

**Properties**

|                                               |                    |
|-----------------------------------------------|--------------------|
| Prio recon                                    | Off                |
| Load images to viewer                         | On                 |
| Inline movie                                  | Off                |
| Auto store images                             | On                 |
| Load images to stamp segments                 | Off                |
| Load images to graphic segments               | Off                |
| Auto open inline display                      | Off                |
| Auto close inline display                     | Off                |
| Start measurement without further preparation | Off                |
| Wait for user to start                        | Off                |
| Start measurements                            | Single measurement |

**Routine**

|                    |                     |
|--------------------|---------------------|
| Slab group         | 1                   |
| Slabs              | 1                   |
| Dist. factor       | 20 %                |
| Position           | R6.7 P19.4 H34.5 mm |
| Orientation        | Sagittal            |
| Phase enc. dir.    | A >> P              |
| AutoAlign          | ---                 |
| Phase oversampling | 0 %                 |
| Slice oversampling | 0.0 %               |
| Slices per slab    | 72                  |
| FoV read           | 128 mm              |
| FoV phase          | 121.9 %             |
| Slice thickness    | 2.00 mm             |
| TR                 | 75.0 ms             |
| TE 1               | 1.54 ms             |
| TE 2               | 4.55 ms             |
| TE 3               | 8.56 ms             |
| Averages           | 1                   |
| Concatenations     | 1                   |
| Filter             | Prescan Normalize   |
| Coil elements      | PeH;PeN             |

**Contrast - Common**

|                   |         |
|-------------------|---------|
| TR                | 75.0 ms |
| TE 1              | 1.54 ms |
| TE 2              | 4.55 ms |
| TE 3              | 8.56 ms |
| MTC               | On      |
| Magn. preparation | None    |
| Flip angle        | 5 deg   |
| Fat suppr.        | None    |
| Water suppr.      | None    |
| SWI               | Off     |

**Contrast - Dynamic**

|                 |                  |
|-----------------|------------------|
| Averages        | 1                |
| Averaging mode  | Short term       |
| Reconstruction  | Magnitude        |
| Measurements    | 1                |
| Multiple series | Each measurement |

**Resolution - Common**

|                 |         |
|-----------------|---------|
| FoV read        | 128 mm  |
| FoV phase       | 121.9 % |
| Slice thickness | 2.00 mm |
| Base resolution | 64      |

**Resolution - Common**

|                       |       |
|-----------------------|-------|
| Phase resolution      | 100 % |
| Slice resolution      | 100 % |
| Phase partial Fourier | 6/8   |
| Slice partial Fourier | Off   |
| Interpolation         | Off   |

**Resolution - iPAT**

|                     |            |
|---------------------|------------|
| PAT mode            | GRAPPA     |
| Accel. factor PE    | 3          |
| Ref. lines PE       | 24         |
| Accel. factor 3D    | 1          |
| Reference scan mode | Integrated |

**Resolution - Filter Image**

|                   |     |
|-------------------|-----|
| Image Filter      | Off |
| Distortion Corr.  | Off |
| Prescan Normalize | On  |
| Unfiltered images | Off |
| Normalize         | Off |
| B1 filter         | Off |

**Resolution - Filter Rawdata**

|                   |     |
|-------------------|-----|
| Raw filter        | Off |
| Elliptical filter | Off |

**Geometry - Common**

|                    |                     |
|--------------------|---------------------|
| Slab group         | 1                   |
| Slabs              | 1                   |
| Dist. factor       | 20 %                |
| Position           | R6.7 P19.4 H34.5 mm |
| Orientation        | Sagittal            |
| Phase enc. dir.    | A >> P              |
| Slice oversampling | 0.0 %               |
| Slices per slab    | 72                  |
| FoV read           | 128 mm              |
| FoV phase          | 121.9 %             |
| Slice thickness    | 2.00 mm             |
| TR                 | 75.0 ms             |
| Multi-slice mode   | Interleaved         |
| Series             | Interleaved         |
| Concatenations     | 1                   |

**Geometry - AutoAlign**

|                     |                     |
|---------------------|---------------------|
| Slab group          | 1                   |
| Position            | R6.7 P19.4 H34.5 mm |
| Orientation         | Sagittal            |
| Phase enc. dir.     | A >> P              |
| AutoAlign           | ---                 |
| Initial Position    | R6.7 P19.4 H34.5    |
| R                   | 6.7 mm              |
| P                   | 19.4 mm             |
| H                   | 34.5 mm             |
| Initial Rotation    | 0.00 deg            |
| Initial Orientation | Sagittal            |

**Geometry - Saturation**

|                 |          |
|-----------------|----------|
| Saturation mode | Standard |
| Fat suppr.      | None     |
| Water suppr.    | None     |
| Special sat.    | None     |

## SIEMENS MAGNETOM Prisma

**Geometry - Tim Planning Suite**

|                   |      |
|-------------------|------|
| Set-n-Go Protocol | Off  |
| Table position    | H    |
| Table position    | 0 mm |
| Inline Composing  | Off  |

**System - Miscellaneous**

|                     |                      |
|---------------------|----------------------|
| Positioning mode    | REF                  |
| Table position      | H                    |
| Table position      | 0 mm                 |
| MSMA                | S - C - T            |
| Sagittal            | R >> L               |
| Coronal             | A >> P               |
| Transversal         | F >> H               |
| Coil Combine Mode   | Sum of Squares       |
| Save uncombined     | Off                  |
| Matrix Optimization | Off                  |
| AutoAlign           | ---                  |
| Coil Select Mode    | Off - AutoCoilSelect |

**System - Adjustments**

|                          |          |
|--------------------------|----------|
| B0 Shim mode             | Tune up  |
| B1 Shim mode             | TrueForm |
| Adjust with body coil    | Off      |
| Confirm freq. adjustment | Off      |
| Assume Dominant Fat      | Off      |
| Assume Silicone          | Off      |
| Adjustment Tolerance     | Auto     |

**System - Adjust Volume**

|             |             |
|-------------|-------------|
| Position    | Isocenter   |
| Orientation | Transversal |
| Rotation    | 0.00 deg    |
| A >> P      | 263 mm      |
| R >> L      | 350 mm      |
| F >> H      | 350 mm      |
| Reset       | Off         |

**System - pTx Volumes**

|              |          |
|--------------|----------|
| B1 Shim mode | TrueForm |
| Excitation   | Non-sel. |

**System - Tx/Rx**

|                     |                |
|---------------------|----------------|
| Frequency 1H        | 123.244480 MHz |
| Correction factor   | 1              |
| Gain                | Low            |
| Img. Scale Cor.     | 3.000          |
| Reset               | Off            |
| ? Ref. amplitude 1H | 0.000 V        |

**Physio - Signal1**

|                 |         |
|-----------------|---------|
| 1st Signal/Mode | None    |
| TR              | 75.0 ms |
| Concatenations  | 1       |
| Segments        | 1       |

**Physio - Cardiac**

|                   |         |
|-------------------|---------|
| Tagging           | None    |
| Magn. preparation | None    |
| Fat suppr.        | None    |
| Dark blood        | Off     |
| FoV read          | 128 mm  |
| FoV phase         | 121.9 % |
| Phase resolution  | 100 %   |

**Physio - PACE**

|                |     |
|----------------|-----|
| Resp. control  | Off |
| Concatenations | 1   |

**Inline - Common**

|                      |     |
|----------------------|-----|
| Subtract             | Off |
| Measurements         | 1   |
| StdDev               | Off |
| Liver registration   | Off |
| Save original images | On  |

**Inline - MIP**

|                      |     |
|----------------------|-----|
| MIP-Sag              | Off |
| MIP-Cor              | Off |
| MIP-Tra              | Off |
| MIP-Time             | Off |
| Save original images | On  |

**Inline - Soft Tissue**

|              |     |
|--------------|-----|
| Wash - In    | Off |
| Wash - Out   | Off |
| TTP          | Off |
| PEI          | Off |
| MIP - time   | Off |
| Measurements | 1   |

**Inline - Composing**

|                  |     |
|------------------|-----|
| Inline Composing | Off |
| Distortion Corr. | Off |

**Inline - MapIt**

|                      |         |
|----------------------|---------|
| Save original images | On      |
| MapIt                | None    |
| Flip angle           | 5 deg   |
| Measurements         | 1       |
| Contrasts            | 3       |
| TR                   | 75.0 ms |
| TE 1                 | 1.54 ms |
| TE 2                 | 4.55 ms |
| TE 3                 | 8.56 ms |

**Sequence - Part 1**

|                     |             |
|---------------------|-------------|
| Introduction        | Off         |
| Dimension           | 3D          |
| Elliptical scanning | On          |
| Phase stabilisation | Off         |
| Asymmetric echo     | Off         |
| Contrasts           | 3           |
| Flow comp. 1        | No          |
| Readout mode        | Bipolar     |
| Multi-slice mode    | Interleaved |
| Bandwidth 1         | 580 Hz/Px   |
| Bandwidth 2         | 580 Hz/Px   |
| Bandwidth 3         | 580 Hz/Px   |

**Sequence - Part 2**

|                          |          |
|--------------------------|----------|
| Segments                 | 1        |
| Acoustic noise reduction | Active   |
| RF pulse type            | Low SAR  |
| Gradient mode            | Normal   |
| Excitation               | Non-sel. |
| RF spoiling              | On       |

## SIEMENS MAGNETOM Prisma

**Sequence - Assistant**

|               |      |
|---------------|------|
| Mode          | Off  |
| Allowed delay | 30 s |

## SIEMENS MAGNETOM Prisma

\\Study Protocols\BRAIN\Neonates\Theirworld - E161723 - MT\_test\MTSatOff\_neonate\_v2

TA: 2:58 PM: FIX Voxel size: 2.0x2.0x2.0 mmPAT: 3 Rel. SNR: 1.00 : qfl

**Properties**

|                                               |                    |
|-----------------------------------------------|--------------------|
| Prio recon                                    | Off                |
| Load images to viewer                         | On                 |
| Inline movie                                  | Off                |
| Auto store images                             | On                 |
| Load images to stamp segments                 | Off                |
| Load images to graphic segments               | Off                |
| Auto open inline display                      | Off                |
| Auto close inline display                     | Off                |
| Start measurement without further preparation | On                 |
| Wait for user to start                        | Off                |
| Start measurements                            | Single measurement |

**Routine**

|                    |                     |
|--------------------|---------------------|
| Slab group         | 1                   |
| Slabs              | 1                   |
| Dist. factor       | 20 %                |
| Position           | R6.7 P19.4 H34.5 mm |
| Orientation        | Sagittal            |
| Phase enc. dir.    | A >> P              |
| AutoAlign          | ---                 |
| Phase oversampling | 0 %                 |
| Slice oversampling | 0.0 %               |
| Slices per slab    | 72                  |
| FoV read           | 128 mm              |
| FoV phase          | 121.9 %             |
| Slice thickness    | 2.00 mm             |
| TR                 | 75.0 ms             |
| TE 1               | 1.54 ms             |
| TE 2               | 4.55 ms             |
| TE 3               | 8.56 ms             |
| Averages           | 1                   |
| Concatenations     | 1                   |
| Filter             | Prescan Normalize   |
| Coil elements      | PeH;PeN             |

**Contrast - Common**

|                   |         |
|-------------------|---------|
| TR                | 75.0 ms |
| TE 1              | 1.54 ms |
| TE 2              | 4.55 ms |
| TE 3              | 8.56 ms |
| MTC               | Off     |
| Magn. preparation | None    |
| Flip angle        | 5 deg   |
| Fat suppr.        | None    |
| Water suppr.      | None    |
| SWI               | Off     |

**Contrast - Dynamic**

|                 |                  |
|-----------------|------------------|
| Averages        | 1                |
| Averaging mode  | Short term       |
| Reconstruction  | Magnitude        |
| Measurements    | 1                |
| Multiple series | Each measurement |

**Resolution - Common**

|                 |         |
|-----------------|---------|
| FoV read        | 128 mm  |
| FoV phase       | 121.9 % |
| Slice thickness | 2.00 mm |
| Base resolution | 64      |

**Resolution - Common**

|                       |       |
|-----------------------|-------|
| Phase resolution      | 100 % |
| Slice resolution      | 100 % |
| Phase partial Fourier | 6/8   |
| Slice partial Fourier | Off   |
| Interpolation         | Off   |

**Resolution - iPAT**

|                     |            |
|---------------------|------------|
| PAT mode            | GRAPPA     |
| Accel. factor PE    | 3          |
| Ref. lines PE       | 24         |
| Accel. factor 3D    | 1          |
| Reference scan mode | Integrated |

**Resolution - Filter Image**

|                   |     |
|-------------------|-----|
| Image Filter      | Off |
| Distortion Corr.  | Off |
| Prescan Normalize | On  |
| Unfiltered images | Off |
| Normalize         | Off |
| B1 filter         | Off |

**Resolution - Filter Rawdata**

|                   |     |
|-------------------|-----|
| Raw filter        | Off |
| Elliptical filter | Off |

**Geometry - Common**

|                    |                     |
|--------------------|---------------------|
| Slab group         | 1                   |
| Slabs              | 1                   |
| Dist. factor       | 20 %                |
| Position           | R6.7 P19.4 H34.5 mm |
| Orientation        | Sagittal            |
| Phase enc. dir.    | A >> P              |
| Slice oversampling | 0.0 %               |
| Slices per slab    | 72                  |
| FoV read           | 128 mm              |
| FoV phase          | 121.9 %             |
| Slice thickness    | 2.00 mm             |
| TR                 | 75.0 ms             |
| Multi-slice mode   | Interleaved         |
| Series             | Interleaved         |
| Concatenations     | 1                   |

**Geometry - AutoAlign**

|                     |                     |
|---------------------|---------------------|
| Slab group          | 1                   |
| Position            | R6.7 P19.4 H34.5 mm |
| Orientation         | Sagittal            |
| Phase enc. dir.     | A >> P              |
| AutoAlign           | ---                 |
| Initial Position    | R6.7 P19.4 H34.5    |
| R                   | 6.7 mm              |
| P                   | 19.4 mm             |
| H                   | 34.5 mm             |
| Initial Rotation    | 0.00 deg            |
| Initial Orientation | Sagittal            |

**Geometry - Saturation**

|                 |          |
|-----------------|----------|
| Saturation mode | Standard |
| Fat suppr.      | None     |
| Water suppr.    | None     |
| Special sat.    | None     |

## SIEMENS MAGNETOM Prisma

**Geometry - Tim Planning Suite**

|                   |      |
|-------------------|------|
| Set-n-Go Protocol | Off  |
| Table position    | H    |
| Table position    | 0 mm |
| Inline Composing  | Off  |

**System - Miscellaneous**

|                     |                      |
|---------------------|----------------------|
| Positioning mode    | FIX                  |
| Table position      | H                    |
| Table position      | 0 mm                 |
| MSMA                | S - C - T            |
| Sagittal            | R >> L               |
| Coronal             | A >> P               |
| Transversal         | F >> H               |
| Coil Combine Mode   | Sum of Squares       |
| Save uncombined     | Off                  |
| Matrix Optimization | Off                  |
| AutoAlign           | ---                  |
| Coil Select Mode    | Off - AutoCoilSelect |

**System - Adjustments**

|                          |          |
|--------------------------|----------|
| B0 Shim mode             | Tune up  |
| B1 Shim mode             | TrueForm |
| Adjust with body coil    | Off      |
| Confirm freq. adjustment | Off      |
| Assume Dominant Fat      | Off      |
| Assume Silicone          | Off      |
| Adjustment Tolerance     | Auto     |

**System - Adjust Volume**

|             |             |
|-------------|-------------|
| Position    | Isocenter   |
| Orientation | Transversal |
| Rotation    | 0.00 deg    |
| A >> P      | 263 mm      |
| R >> L      | 350 mm      |
| F >> H      | 350 mm      |
| Reset       | Off         |

**System - pTx Volumes**

|              |          |
|--------------|----------|
| B1 Shim mode | TrueForm |
| Excitation   | Non-sel. |

**System - Tx/Rx**

|                     |                |
|---------------------|----------------|
| Frequency 1H        | 123.244480 MHz |
| Correction factor   | 1              |
| Gain                | Low            |
| Img. Scale Cor.     | 3.000          |
| Reset               | Off            |
| ? Ref. amplitude 1H | 0.000 V        |

**Physio - Signal1**

|                 |         |
|-----------------|---------|
| 1st Signal/Mode | None    |
| TR              | 75.0 ms |
| Concatenations  | 1       |
| Segments        | 1       |

**Physio - Cardiac**

|                   |         |
|-------------------|---------|
| Tagging           | None    |
| Magn. preparation | None    |
| Fat suppr.        | None    |
| Dark blood        | Off     |
| FoV read          | 128 mm  |
| FoV phase         | 121.9 % |
| Phase resolution  | 100 %   |

**Physio - PACE**

|                |     |
|----------------|-----|
| Resp. control  | Off |
| Concatenations | 1   |

**Inline - Common**

|                      |     |
|----------------------|-----|
| Subtract             | Off |
| Measurements         | 1   |
| StdDev               | Off |
| Liver registration   | Off |
| Save original images | On  |

**Inline - MIP**

|                      |     |
|----------------------|-----|
| MIP-Sag              | Off |
| MIP-Cor              | Off |
| MIP-Tra              | Off |
| MIP-Time             | Off |
| Save original images | On  |

**Inline - Soft Tissue**

|              |     |
|--------------|-----|
| Wash - In    | Off |
| Wash - Out   | Off |
| TTP          | Off |
| PEI          | Off |
| MIP - time   | Off |
| Measurements | 1   |

**Inline - Composing**

|                  |     |
|------------------|-----|
| Inline Composing | Off |
| Distortion Corr. | Off |

**Inline - MapIt**

|                      |         |
|----------------------|---------|
| Save original images | On      |
| MapIt                | None    |
| Flip angle           | 5 deg   |
| Measurements         | 1       |
| Contrasts            | 3       |
| TR                   | 75.0 ms |
| TE 1                 | 1.54 ms |
| TE 2                 | 4.55 ms |
| TE 3                 | 8.56 ms |

**Sequence - Part 1**

|                     |             |
|---------------------|-------------|
| Introduction        | Off         |
| Dimension           | 3D          |
| Elliptical scanning | On          |
| Phase stabilisation | Off         |
| Asymmetric echo     | Off         |
| Contrasts           | 3           |
| Flow comp. 1        | No          |
| Readout mode        | Bipolar     |
| Multi-slice mode    | Interleaved |
| Bandwidth 1         | 580 Hz/Px   |
| Bandwidth 2         | 580 Hz/Px   |
| Bandwidth 3         | 580 Hz/Px   |

**Sequence - Part 2**

|                          |          |
|--------------------------|----------|
| Segments                 | 1        |
| Acoustic noise reduction | Active   |
| RF pulse type            | Low SAR  |
| Gradient mode            | Normal   |
| Excitation               | Non-sel. |
| RF spoiling              | On       |

## SIEMENS MAGNETOM Prisma

**Sequence - Assistant**

|               |      |
|---------------|------|
| Mode          | Off  |
| Allowed delay | 30 s |

## SIEMENS MAGNETOM Prisma

\\Study Protocols\BRAIN\Neonates\Theirworld - E161723 - MT\_test\MTSatT1\_neonate\_v2

TA: 0:36 PM: FIX Voxel size: 2.0×2.0×2.0 mmPAT: 3 Rel. SNR: 1.00 : qfl

**Properties**

|                                               |                    |
|-----------------------------------------------|--------------------|
| Prio recon                                    | Off                |
| Load images to viewer                         | On                 |
| Inline movie                                  | Off                |
| Auto store images                             | On                 |
| Load images to stamp segments                 | Off                |
| Load images to graphic segments               | Off                |
| Auto open inline display                      | Off                |
| Auto close inline display                     | Off                |
| Start measurement without further preparation | On                 |
| Wait for user to start                        | Off                |
| Start measurements                            | Single measurement |

**Routine**

|                    |                     |
|--------------------|---------------------|
| Slab group         | 1                   |
| Slabs              | 1                   |
| Dist. factor       | 20 %                |
| Position           | R6.7 P19.4 H34.5 mm |
| Orientation        | Sagittal            |
| Phase enc. dir.    | A >> P              |
| AutoAlign          | ---                 |
| Phase oversampling | 0 %                 |
| Slice oversampling | 0.0 %               |
| Slices per slab    | 72                  |
| FoV read           | 128 mm              |
| FoV phase          | 121.9 %             |
| Slice thickness    | 2.00 mm             |
| TR                 | 15.0 ms             |
| TE 1               | 1.54 ms             |
| TE 2               | 4.55 ms             |
| TE 3               | 8.56 ms             |
| Averages           | 1                   |
| Concatenations     | 1                   |
| Filter             | Prescan Normalize   |
| Coil elements      | PeH;PeN             |

**Contrast - Common**

|                   |         |
|-------------------|---------|
| TR                | 15.0 ms |
| TE 1              | 1.54 ms |
| TE 2              | 4.55 ms |
| TE 3              | 8.56 ms |
| MTC               | Off     |
| Magn. preparation | None    |
| Flip angle        | 14 deg  |
| Fat suppr.        | None    |
| Water suppr.      | None    |
| SWI               | Off     |

**Contrast - Dynamic**

|                 |                  |
|-----------------|------------------|
| Averages        | 1                |
| Averaging mode  | Short term       |
| Reconstruction  | Magnitude        |
| Measurements    | 1                |
| Multiple series | Each measurement |

**Resolution - Common**

|                 |         |
|-----------------|---------|
| FoV read        | 128 mm  |
| FoV phase       | 121.9 % |
| Slice thickness | 2.00 mm |
| Base resolution | 64      |

**Resolution - Common**

|                       |       |
|-----------------------|-------|
| Phase resolution      | 100 % |
| Slice resolution      | 100 % |
| Phase partial Fourier | 6/8   |
| Slice partial Fourier | Off   |
| Interpolation         | Off   |

**Resolution - iPAT**

|                     |            |
|---------------------|------------|
| PAT mode            | GRAPPA     |
| Accel. factor PE    | 3          |
| Ref. lines PE       | 24         |
| Accel. factor 3D    | 1          |
| Reference scan mode | Integrated |

**Resolution - Filter Image**

|                   |     |
|-------------------|-----|
| Image Filter      | Off |
| Distortion Corr.  | Off |
| Prescan Normalize | On  |
| Unfiltered images | Off |
| Normalize         | Off |
| B1 filter         | Off |

**Resolution - Filter Rawdata**

|                   |     |
|-------------------|-----|
| Raw filter        | Off |
| Elliptical filter | Off |

**Geometry - Common**

|                    |                     |
|--------------------|---------------------|
| Slab group         | 1                   |
| Slabs              | 1                   |
| Dist. factor       | 20 %                |
| Position           | R6.7 P19.4 H34.5 mm |
| Orientation        | Sagittal            |
| Phase enc. dir.    | A >> P              |
| Slice oversampling | 0.0 %               |
| Slices per slab    | 72                  |
| FoV read           | 128 mm              |
| FoV phase          | 121.9 %             |
| Slice thickness    | 2.00 mm             |
| TR                 | 15.0 ms             |
| Multi-slice mode   | Interleaved         |
| Series             | Interleaved         |
| Concatenations     | 1                   |

**Geometry - AutoAlign**

|                     |                     |
|---------------------|---------------------|
| Slab group          | 1                   |
| Position            | R6.7 P19.4 H34.5 mm |
| Orientation         | Sagittal            |
| Phase enc. dir.     | A >> P              |
| AutoAlign           | ---                 |
| Initial Position    | R6.7 P19.4 H34.5    |
| R                   | 6.7 mm              |
| P                   | 19.4 mm             |
| H                   | 34.5 mm             |
| Initial Rotation    | 0.00 deg            |
| Initial Orientation | Sagittal            |

**Geometry - Saturation**

|                 |          |
|-----------------|----------|
| Saturation mode | Standard |
| Fat suppr.      | None     |
| Water suppr.    | None     |
| Special sat.    | None     |

## SIEMENS MAGNETOM Prisma

**Geometry - Tim Planning Suite**

|                   |      |
|-------------------|------|
| Set-n-Go Protocol | Off  |
| Table position    | H    |
| Table position    | 0 mm |
| Inline Composing  | Off  |

**System - Miscellaneous**

|                     |                      |
|---------------------|----------------------|
| Positioning mode    | FIX                  |
| Table position      | H                    |
| Table position      | 0 mm                 |
| MSMA                | S - C - T            |
| Sagittal            | R >> L               |
| Coronal             | A >> P               |
| Transversal         | F >> H               |
| Coil Combine Mode   | Sum of Squares       |
| Save uncombined     | Off                  |
| Matrix Optimization | Off                  |
| AutoAlign           | ---                  |
| Coil Select Mode    | Off - AutoCoilSelect |

**System - Adjustments**

|                          |          |
|--------------------------|----------|
| B0 Shim mode             | Tune up  |
| B1 Shim mode             | TrueForm |
| Adjust with body coil    | Off      |
| Confirm freq. adjustment | Off      |
| Assume Dominant Fat      | Off      |
| Assume Silicone          | Off      |
| Adjustment Tolerance     | Auto     |

**System - Adjust Volume**

|             |             |
|-------------|-------------|
| Position    | Isocenter   |
| Orientation | Transversal |
| Rotation    | 0.00 deg    |
| A >> P      | 263 mm      |
| R >> L      | 350 mm      |
| F >> H      | 350 mm      |
| Reset       | Off         |

**System - pTx Volumes**

|              |          |
|--------------|----------|
| B1 Shim mode | TrueForm |
| Excitation   | Non-sel. |

**System - Tx/Rx**

|                     |                |
|---------------------|----------------|
| Frequency 1H        | 123.244480 MHz |
| Correction factor   | 1              |
| Gain                | Low            |
| Img. Scale Cor.     | 3.000          |
| Reset               | Off            |
| ? Ref. amplitude 1H | 0.000 V        |

**Physio - Signal1**

|                 |         |
|-----------------|---------|
| 1st Signal/Mode | None    |
| TR              | 15.0 ms |
| Concatenations  | 1       |
| Segments        | 1       |

**Physio - Cardiac**

|                   |         |
|-------------------|---------|
| Tagging           | None    |
| Magn. preparation | None    |
| Fat suppr.        | None    |
| Dark blood        | Off     |
| FoV read          | 128 mm  |
| FoV phase         | 121.9 % |
| Phase resolution  | 100 %   |

**Physio - PACE**

|                |     |
|----------------|-----|
| Resp. control  | Off |
| Concatenations | 1   |

**Inline - Common**

|                      |     |
|----------------------|-----|
| Subtract             | Off |
| Measurements         | 1   |
| StdDev               | Off |
| Liver registration   | Off |
| Save original images | On  |

**Inline - MIP**

|                      |     |
|----------------------|-----|
| MIP-Sag              | Off |
| MIP-Cor              | Off |
| MIP-Tra              | Off |
| MIP-Time             | Off |
| Save original images | On  |

**Inline - Soft Tissue**

|              |     |
|--------------|-----|
| Wash - In    | Off |
| Wash - Out   | Off |
| TTP          | Off |
| PEI          | Off |
| MIP - time   | Off |
| Measurements | 1   |

**Inline - Composing**

|                  |     |
|------------------|-----|
| Inline Composing | Off |
| Distortion Corr. | Off |

**Inline - MapIt**

|                      |         |
|----------------------|---------|
| Save original images | On      |
| MapIt                | None    |
| Flip angle           | 14 deg  |
| Measurements         | 1       |
| Contrasts            | 3       |
| TR                   | 15.0 ms |
| TE 1                 | 1.54 ms |
| TE 2                 | 4.55 ms |
| TE 3                 | 8.56 ms |

**Sequence - Part 1**

|                     |             |
|---------------------|-------------|
| Introduction        | Off         |
| Dimension           | 3D          |
| Elliptical scanning | On          |
| Phase stabilisation | Off         |
| Asymmetric echo     | Off         |
| Contrasts           | 3           |
| Flow comp. 1        | No          |
| Readout mode        | Bipolar     |
| Multi-slice mode    | Interleaved |
| Bandwidth 1         | 580 Hz/Px   |
| Bandwidth 2         | 580 Hz/Px   |
| Bandwidth 3         | 580 Hz/Px   |

**Sequence - Part 2**

|                          |          |
|--------------------------|----------|
| Segments                 | 1        |
| Acoustic noise reduction | Active   |
| RF pulse type            | Low SAR  |
| Gradient mode            | Normal   |
| Excitation               | Non-sel. |
| RF spoiling              | On       |



## SIEMENS MAGNETOM Prisma

**Sequence - Assistant**

|               |      |
|---------------|------|
| Mode          | Off  |
| Allowed delay | 30 s |
